# Supplementary material
Source: PubMed Central journal article supplement (PMC7096265)
Supplement: NIHMS1546199-supplement-1.pdf [file NIHMS1546199-supplement-1.pdf]

**Supplementary Table 1: Distribution of study patients by age at the end of follow-up and person-years of observation contributed**

| Patient age at the end of follow-up (year) | No. of patients (%) | Mean age at end of follow-up | Person-Years of follow-up contributed (%) |
|--------------------------------------------|---------------------|------------------------------|-------------------------------------------|
| 40-44                                      | 130 (0.5%)          | 43.8                         | 282.7 (0.1%)                              |
| 45-49                                      | 648 (2.5%)          | 48.0                         | 2621.5 (1.3%)                             |
| 50-54                                      | 2489 (9.7%)         | 53.0                         | 12404.3 (6.0%)                            |
| 55-59                                      | 4331 (16.8%)        | 57.7                         | 28020.5 (13.6%)                           |
| 60-64                                      | 5101 (19.8%)        | 62.5                         | 42397.2 (20.6%)                           |
| 65-69                                      | 4840 (18.8%)        | 67.4                         | 42392.3 (20.6%)                           |
| 70-74                                      | 3344 (13.0%)        | 72.4                         | 29450.8 (14.3%)                           |
| 75-79                                      | 2257 (8.8%)         | 77.3                         | 21438.4 (10.4%)                           |
| 80+                                        | 2652 (10.3%)        | 85.1                         | 26514.6 (12.9%)                           |
| <b>Total</b>                               | 25792*              | 66.1                         | 205,522.3                                 |

\* Total patients in this table is 70 less than the total cohort; they had CRC at screening, with date of cancer diagnosis in the cancer registry matching the colonoscopy date, censored at colonoscopy date due to the cancer diagnosis.

**Supplementary Table 2: Supplement to Table 4 - Exclusions applied by the current study and comparison studies of interval cancer**

|                                                  | Current study                                                                                                                                                                                                                | Polyp Prevention Trial <sup>4,5,10</sup>                                                                                                                                                                           | National Polyp Study <sup>3,34</sup>                                                                                                               | PLCO study <sup>6</sup>                     | KP 2014 <sup>16</sup>      | KP 2019 <sup>41</sup>                                                                                                      |
|--------------------------------------------------|------------------------------------------------------------------------------------------------------------------------------------------------------------------------------------------------------------------------------|--------------------------------------------------------------------------------------------------------------------------------------------------------------------------------------------------------------------|----------------------------------------------------------------------------------------------------------------------------------------------------|---------------------------------------------|----------------------------|----------------------------------------------------------------------------------------------------------------------------|
| <b>Total 1<sup>st</sup> colonoscopy patients</b> | 26,011                                                                                                                                                                                                                       | 37,175                                                                                                                                                                                                             | 9,112                                                                                                                                              | 15,395                                      | 273,742                    | Complex sample with mixed screening methods                                                                                |
| <b>Exclusion criteria</b>                        | - Prior CRC diagnosis (58)<br>- CRC at screening (159)<br>- Prior bowel pathology or resection (50)<br>- Carcinoid (41)<br>- Incomplete colonoscopy, no make-up (445)<br>- Large/vascular polyp referred for resection (250) | - Prior CRC diagnosis (2,544)<br>- CRC at screening (1,029)<br>- Prior bowel pathology (2,085)<br>- Incomplete colonoscopy (2,160)<br>- Large polyps referred /incomplete removal (3,718)<br>- Other reasons (161) | - CRC at screening (549)<br>- Prior bowel pathology (111)<br>- Incomplete colonoscopy (208)<br>- Large polyp referred (35)<br>- Other reasons (38) | No exclusions                               | - CRC at screening (8,018) | - Previous FIT/FOBT - 184,327<br>- Patients with family history of CRC<br>- Other exclusions as listed under Current study |
| <b>Other study-specific exclusions</b>           | NA                                                                                                                                                                                                                           | Subject readiness - 23,399                                                                                                                                                                                         | -No polyps (4763) -Other (1244)                                                                                                                    | Subject readiness                           | 41,882                     | -                                                                                                                          |
| <b>Total all exclusions</b>                      | 1,003 (3.9%)                                                                                                                                                                                                                 | 35,096 (94.4%)                                                                                                                                                                                                     | 7694 (84.4%)                                                                                                                                       | NA                                          | 49,900 (18.2%)             | 520,499                                                                                                                    |
| <b>CRC-free at screening</b>                     | 25,008 (7,530 with adenoma, 17,478 no-adenoma)                                                                                                                                                                               | 2,079 (all adenoma patients)                                                                                                                                                                                       | 1,418 (all adenoma patients)                                                                                                                       | 15,935 (7950 with adenoma, 7985 no-adenoma) | 223,842 (adenoma-wise NA)  | 99,166 no-adenoma patients                                                                                                 |

\* For comparisons, all patients or adenoma patients of the study cohort were compared based on the comparison study patient type
